# Supplementary material for: Prospective evaluation of interrater agreement between EEG technologists and neurophysiologists
Source: Springer Nature journal article supplement (doi:10.1038/s41598-021-92827-3), 2021-06-28
Supplement: MOESM1 [file 41598_2021_92827_MOESM1_ESM.pdf]

|                |                                                                               |                                                                                          |
|----------------|-------------------------------------------------------------------------------|------------------------------------------------------------------------------------------|
| Patient's Name | Date: _____                                                                   | Diagnoses: _____                                                                         |
| PID            | Age _____ (Years)                                                             | Epilepsy      yes <input type="checkbox"/> (1)    no <input type="checkbox"/> (0)        |
|                | Gender:    W <input type="checkbox"/> (0)      M <input type="checkbox"/> (1) | Sleep deprivation    yes <input type="checkbox"/> (1)    no <input type="checkbox"/> (0) |

|                       |                                                                                                                                                                                                                                                                                                                                                                                                                                                                                                                                                |                                                                                                                                                                                                                                                                                                                                                                                                                                                                                           |
|-----------------------|------------------------------------------------------------------------------------------------------------------------------------------------------------------------------------------------------------------------------------------------------------------------------------------------------------------------------------------------------------------------------------------------------------------------------------------------------------------------------------------------------------------------------------------------|-------------------------------------------------------------------------------------------------------------------------------------------------------------------------------------------------------------------------------------------------------------------------------------------------------------------------------------------------------------------------------------------------------------------------------------------------------------------------------------------|
| VIGILANCE             | awake <input type="checkbox"/> (3)<br>somnolent (noise)<br><input type="checkbox"/> (2) stuporous<br>(pain) <input type="checkbox"/> (1)<br>comatose <input type="checkbox"/> (0)                                                                                                                                                                                                                                                                                                                                                              | 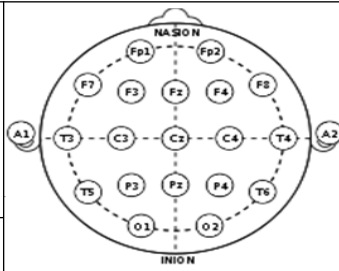                                                                                                                                                                                                                                                                                                                                                                                                       |
|                       | good <input type="checkbox"/> (2)    average <input type="checkbox"/> (1)    poor <input type="checkbox"/> (0)<br>Comments:                                                                                                                                                                                                                                                                                                                                                                                                                    |                                                                                                                                                                                                                                                                                                                                                                                                                                                                                           |
| COLLABORATION         | Yes <input type="checkbox"/> (1)                      No <input type="checkbox"/> (0)<br><b>if yes →</b> Sleep stage: I <input type="checkbox"/> (1)    II <input type="checkbox"/> (1)    III <input type="checkbox"/> (1)    REM <input type="checkbox"/> (1)                                                                                                                                                                                                                                                                                | Trepanation <input type="checkbox"/> (1) <input type="checkbox"/> (0)<br>Sleep stage <input type="checkbox"/> (1) <input type="checkbox"/> (0)<br>I <input type="checkbox"/> (1) II <input type="checkbox"/> (1) III <input type="checkbox"/> (1) REM <input type="checkbox"/> (1)                                                                                                                                                                                                        |
| SLEEP                 | Yes <input type="checkbox"/> (1)                      No <input type="checkbox"/> (0)<br><b>if yes →</b><br>cooperation: good <input type="checkbox"/> (2)    average <input type="checkbox"/> (1)    poor <input type="checkbox"/> (0)<br>generalized slowing <input type="checkbox"/> (1)<br>focal slowing <input type="checkbox"/> (1)<br>IEDs <input type="checkbox"/> (1)                                                                                                                                                                 | HV<br>generalized slowing<br><input type="checkbox"/> (1)<br>focal slowing <input type="checkbox"/> (1)<br>IEDs <input type="checkbox"/> (1)                                                                                                                                                                                                                                                                                                                                              |
| HYPERVENTILATION      | Yes <input type="checkbox"/> (1)                      No <input type="checkbox"/> (0)<br><b>if yes →</b> Photic driving <input type="checkbox"/> (1)<br>Photoparoxysmal reaction <input type="checkbox"/> (1)                                                                                                                                                                                                                                                                                                                                  | Photic driving <input type="checkbox"/> (1)<br>Photoparoxysmal reaction <input type="checkbox"/> (1)                                                                                                                                                                                                                                                                                                                                                                                      |
| PHOTIC STIMULATION    | Frequency: _____ Hz<br>Bi-occipital : No <input type="checkbox"/> (0)<br>Symmetric: No <input type="checkbox"/> (0)<br>Reactive: No <input type="checkbox"/> (0)                                                                                                                                                                                                                                                                                                                                                                               | _____ Hz<br>bi-occ. <input type="checkbox"/> (0)<br>Symm. <input type="checkbox"/> (0)<br>Reactive <input type="checkbox"/> (0)                                                                                                                                                                                                                                                                                                                                                           |
| BACKGROUND ACTIVITY   | <b>Slowing:</b> Yes <input type="checkbox"/> (1)                      No <input type="checkbox"/> (0)<br><b>if yes →</b><br>Focal : yes <input type="checkbox"/> (1)<br>Intermittent <input type="checkbox"/> (1)    Continuous <input type="checkbox"/> (1)<br>Hemispheric: yes <input type="checkbox"/> (1)<br>Intermittent <input type="checkbox"/> (1)    Continuous <input type="checkbox"/> (1)<br>Generalized: yes <input type="checkbox"/> (1)<br>Intermittent <input type="checkbox"/> (1)    Continuous <input type="checkbox"/> (1) | Slowing <input type="checkbox"/> (1) <input type="checkbox"/> (0)<br><br>Focal <input type="checkbox"/> (1)<br>- intermittent <input type="checkbox"/> (1)<br>- continuous <input type="checkbox"/> (1)<br><br>Focal <input type="checkbox"/> (1)<br>- intermittent <input type="checkbox"/> (1)<br>- continuous <input type="checkbox"/> (1)<br><br>Generalized <input type="checkbox"/> (1)<br>- intermittent <input type="checkbox"/> (1)<br>- continuous <input type="checkbox"/> (1) |
| PATHOLOGICAL FINDINGS | <b>IEDs:</b> Yes <input type="checkbox"/> (1)                      No <input type="checkbox"/> (0)<br><b>if yes →</b><br>focal yes <input type="checkbox"/> (1)<br>multifocal yes <input type="checkbox"/> (1)<br>generalized yes <input type="checkbox"/> (1)                                                                                                                                                                                                                                                                                 | IEDs <input type="checkbox"/> (1) <input type="checkbox"/> (0)<br><br>focal <input type="checkbox"/> (1)<br>multifocal <input type="checkbox"/> (1)<br>generalized <input type="checkbox"/> (1)                                                                                                                                                                                                                                                                                           |
|                       | <b>Periodic pattern :</b> yes <input type="checkbox"/> (1)<br><b>Seizure:</b> yes <input type="checkbox"/> (1)<br><b>Status epilepticus :</b> yes <input type="checkbox"/> (1)                                                                                                                                                                                                                                                                                                                                                                 | Periodic patterns. <input type="checkbox"/> (1)<br><br>Seizure <input type="checkbox"/> (1)<br><br>Status epilepticus <input type="checkbox"/> (1)                                                                                                                                                                                                                                                                                                                                        |
|                       | EEG- technologist:<br>Normal : <input type="checkbox"/> (0)<br>Pathological: <input type="checkbox"/> (1)                                                                                                                                                                                                                                                                                                                                                                                                                                      | Physician:<br><br>Normal <input type="checkbox"/> (0)<br>Pathological <input type="checkbox"/> (1)                                                                                                                                                                                                                                                                                                                                                                                        |
| Global Conclusions    |                                                                                                                                                                                                                                                                                                                                                                                                                                                                                                                                                |                                                                                                                                                                                                                                                                                                                                                                                                                                                                                           |
